# Supplementary material
Source: HighWire-hosted journal article supplement (https://ard.bmj.com/highwire/filestream/202670/field_highwire_adjunct_files/1/ARD_tables_153536.pdf)
Supplement: ARD_tables_153536.pdf [file ARD_tables_153536.pdf]

Supplementary Table 1 – Validation of VTE events.

| <b>Validation stages</b>                                                                                                  | <b>Validation criteria</b>                                                                                                                                                                                                                                                                                                                                                                             |
|---------------------------------------------------------------------------------------------------------------------------|--------------------------------------------------------------------------------------------------------------------------------------------------------------------------------------------------------------------------------------------------------------------------------------------------------------------------------------------------------------------------------------------------------|
| <p>Stage 1</p> <p><i>N.B. events coded to any of the terms were included for validation</i></p>                           | Coded to medDRA Higher Level Group Term ‘Embolism & Thrombosis’                                                                                                                                                                                                                                                                                                                                        |
| <p>Stage 2</p> <p><i>N.B. evidence of at least 1 of these must have been present for verification to be completed</i></p> | <p>Presence of positive Doppler ultrasound scan for DVT</p> <p>Or</p> <p>Pulmonary Ventilation/Perfusion (VQ) or Computed Tomography Pulmonary Angiogram (CPTA) scan for PE</p> <p>Or</p> <p>Consultant reported event</p> <p>Or</p> <p>Listed as cause of death on Office of National Statistics (ONS) death certificate</p> <p>Or</p> <p>Patient reported event with a prescription for warfarin</p> |

Supplementary Table 2 – Hazard rates of verified first VTE in nbDMARD and anti-TNF treated patients.

| <b>Univariate predictor</b>               | <b>nbDMARD</b> | <b>Anti-TNF</b>       | <b>ETN</b>            | <b>INF</b>            | <b>ADA</b>            |
|-------------------------------------------|----------------|-----------------------|-----------------------|-----------------------|-----------------------|
| <b>Unadjusted HR</b>                      | referent       | 1.1 [0.8, 1.6]        | 1.0 [0.7, 1.6]        | 1.4 [0.9, 2.1]        | 1.0 [0.6, 1.5]        |
| <b>Sensitivity analyses (unadjusted)*</b> | referent       | 1.2 [0.8, 1.7]        | 1.1 [0.7, 1.7]        | 1.4 [0.9, 2.1]        | 1.2 [0.8, 1.8]        |
| <b>Adjusted HR 1**</b>                    | referent       | 0.9 [0.6, 1.4]        | 0.9 [0.5, 1.4]        | 1.0 [0.6, 1.6]        | 0.9 [0.6, 1.5]        |
| <b>Adjusted HR 2***</b>                   | referent       | <b>0.9 [0.5, 1.5]</b> | <b>0.8 [0.4, 1.5]</b> | <b>1.1 [0.6, 2.0]</b> | <b>0.8 [0.4, 1.4]</b> |
| <b>Adjusted HR 3****</b>                  | referent       | <b>0.8 [0.5, 1.5]</b> | <b>0.8 [0.4, 1.4]</b> | <b>1.1 [0.6, 1.9]</b> | <b>0.8 [0.4, 1.4]</b> |

\* anti-TNF patients on drug with a 90 day lag window.

\*\* adjusted for age, gender, diabetes, baseline steroid exposure, smoking, hypertension, disease duration, disease severity, year of first anti-TNF drug and year of entry into study without imputation.

\*\*\*fully adjusted IPTW model, not including surgery as a time-varying co-variate **with imputation**.

\*\*\*\*fully adjusted IPTW model with orthopaedic surgery as a time-varying co-variate **with imputation**.

Supplementary Table 3 - Univariate predictors of VTE in whole cohort.

| <b>Univariate predictor</b>            | <b>HR for all patients</b> |
|----------------------------------------|----------------------------|
|                                        | <b>n=15554</b>             |
| <b>Age (per year increase)</b>         | 1.0 [1.0, 1.1]             |
| <b>Sex</b>                             | 0.7 [0.5, 0.9]             |
| <b>Disease duration</b>                | 1.0 [1.0, 1.0]             |
| <b>Entry year</b>                      |                            |
| <b>2003</b>                            | 0.9 [0.6, 1.3]             |
| <b>2004</b>                            | 0.8 [0.6, 1.2]             |
| <b>2005</b>                            | 0.6 [0.4, 1.0]             |
| <b>2006</b>                            | 0.5 [0.2, 0.8]             |
| <b>2007</b>                            | 0.8 [0.4, 1.5]             |
| <b>2008</b>                            | 0.3 [0.1, 1.1]             |
| <b>DAS28 score</b>                     | 1.0 [0.9, 1.1]             |
| <b>HAQ score</b>                       | 1.4 [1.1, 1.7]             |
| <b>Corticosteroids</b>                 | 1.8 [1.4, 2.3]             |
| <b>Diabetes</b>                        | 1.0 [0.6, 1.8]             |
| <b>Hypertension</b>                    | 1.4 [1.1, 1.8]             |
| <b>Smoking status (current smoker)</b> | 0.8 [0.6, 1.1]             |

Supplementary Table 4 – Risk of VTE in anti-TNF compared to nbDMARD cohort (univariate adjusting).

| <b>Univariate predictor</b>            | <b>nbDMARD</b> | <b>Anti-TNF</b> |
|----------------------------------------|----------------|-----------------|
| <b>Unadjusted HR</b>                   | referent       | 1.1 [0.8, 1.6]  |
| <b>Age</b>                             | referent       | 1.2 [0.9, 1.7]  |
| <b>Sex</b>                             | referent       | 1.0 [0.7, 1.4]  |
| <b>Entry year</b>                      | referent       | 0.8 [0.6, 1.1]  |
| <b>DAS28 score</b>                     | referent       | 0.9 [0.6, 1.4]  |
| <b>HAQ score</b>                       | referent       | 0.8 [0.6, 1.2]  |
| <b>Corticosteroids</b>                 | referent       | 0.9 [0.6, 1.2]  |
| <b>Diabetes</b>                        | referent       | 1.0 [0.7, 1.4]  |
| <b>Hypertension</b>                    | referent       | 1.0 [0.7, 1.4]  |
| <b>Smoking status (current smoker)</b> | referent       | 1.0 [0.7, 1.4]  |
